# Supplementary material
Source: publisher figshare collection journal article supplement (https://tandf.figshare.com/ndownloader/files/14090828)
Supplement: Supplementary file 1 [file 14090828]

## Supplement S1

### outcomes for spinal fusion patients

| Outcomes                   | Illustrative comparative risks* (95% CI) |                                                                                                           | Relative effect (95% CI) | No of Participants (studies) | Quality of the evidence (GRADE)           | Comments |
|----------------------------|------------------------------------------|-----------------------------------------------------------------------------------------------------------|--------------------------|------------------------------|-------------------------------------------|----------|
|                            | Assumed risk                             | Corresponding risk                                                                                        |                          |                              |                                           |          |
|                            | Control                                  | Outcomes                                                                                                  |                          |                              |                                           |          |
| VAS                        |                                          | The mean vas in the intervention groups was <b>8.85 lower</b> (10.77 to 6.93 lower)                       |                          | 2161 (10)                    |                                           |          |
| VAS - VAS at 12 h          |                                          | The mean vas - vas at 12 h in the intervention groups was <b>7.45 lower</b> (9.08 to 5.82 lower)          |                          | 916 (9 studies)              | ⊕ ⊕ ⊕ ⊖<br><b>moderate</b> <sup>1,2</sup> |          |
| VAS - VAS at 24 h          |                                          | The mean vas - vas at 24 h in the intervention groups was <b>10.97 lower</b> (15.15 to 6.79 lower)        |                          | 564 (8 studies)              | ⊕ ⊕ ⊕ ⊖<br><b>moderate</b> <sup>3</sup>   |          |
| VAS - VAS at 48 h          |                                          | The mean vas - vas at 48 h in the intervention groups was <b>9.6 lower</b> (15.23 to 3.97 lower)          |                          | 417 (5 studies)              | ⊕ ⊕ ⊖ ⊖<br><b>low</b> <sup>4</sup>        |          |
| VAS - VAS at 72 h          |                                          | The mean vas - vas at 72 h in the intervention groups was <b>5.33 lower</b> (6.95 to 3.71 lower)          |                          | 264 (3 studies)              | ⊕ ⊕ ⊕ ⊖<br><b>moderate</b> <sup>5</sup>   |          |
| Total morphine consumption |                                          | The mean total morphine consumption in the intervention groups was <b>5.24 lower</b> (6.53 to 3.95 lower) |                          | 703 (7 studies)              | ⊕ ⊕ ⊖ ⊖<br><b>low</b> <sup>6</sup>        |          |
| Length of hospital stay    |                                          | The mean length of hospital stay in the intervention groups was <b>0.86 lower</b> (1.15 to 0.57 lower)    |                          | 404 (5 studies)              | ⊕ ⊕ ⊕ ⊕<br><b>high</b>                    |          |
| PONV                       | Study population                         |                                                                                                           | RR 0.44 (0.31 to 0.62)   | 753 (7 studies)              | ⊕ ⊕ ⊕ ⊕<br><b>high</b>                    |          |
|                            | 240 per 1000                             | 106 per 1000 (74 to 149)                                                                                  |                          |                              |                                           |          |
|                            | Moderate                                 |                                                                                                           |                          |                              |                                           |          |
|                            | 194 per 1000                             | 85 per 1000 (60 to 120)                                                                                   |                          |                              |                                           |          |
| Infection                  | Study population                         |                                                                                                           | RR 0.78 (0.32 to 1.86)   | 417 (6 studies)              | ⊕ ⊕ ⊕ ⊕<br><b>high</b>                    |          |
|                            | 47 per 1000                              | 37 per 1000 (15 to 87)                                                                                    |                          |                              |                                           |          |
|                            | Moderate                                 |                                                                                                           |                          |                              |                                           |          |
|                            | 43 per 1000                              | 34 per 1000 (14 to 80)                                                                                    |                          |                              |                                           |          |

---

\*The basis for the **assumed risk** (e.g. the median control group risk across studies) is provided in footnotes. The **corresponding risk** (and its 95% confidence interval) is based on the assumed risk in the comparison group and the **relative effect** of the intervention (and its 95% CI).

**CI:** Confidence interval; **RR:** Risk ratio;

---

GRADE Working Group grades of evidence

**High quality:** Further research is very unlikely to change our confidence in the estimate of effect.

**Moderate quality:** Further research is likely to have an important impact on our confidence in the estimate of effect and may change the estimate.

**Low quality:** Further research is very likely to have an important impact on our confidence in the estimate of effect and is likely to change the estimate.

**Very low quality:** We are very uncertain about the estimate.

---

<sup>1</sup> I<sup>2</sup>=88%

<sup>2</sup> I<sup>2</sup>=49%

<sup>3</sup> I<sup>2</sup>=90%

<sup>4</sup> I<sup>2</sup>=65%

<sup>5</sup> No explanation was provided

<sup>6</sup> I<sup>2</sup>=68%

---

Supplement S1: GRADE profile evidence for outcomes.
